# Supplementary material for: Safety Management of via Ferrata Climbers in the European Alps-Epidemiology of Injuries and First Aid Knowledge of the Mountaineers
Source: Preprints.org preprint supplement (doi:10.20944/preprints202308.1706.v1), 2023-08-24
Supplement: Supplementary file 1 [file supplementary]

## Supplement 1: Questionnaire with correct answers indicated in red

Please answer the questions, which are marked with a small box, with a cross („X“) and questions with a free space \_\_\_\_ by filling in numbers or keywords. Please answer the questions without team work (after filling in we can talk about “right” and “wrong”).

Personal questions:

Age: \_\_\_\_ Years      Male ☐      Female ☐      Size: \_\_\_\_ cm      Weight: \_\_\_\_ kg

Country: D ☐    CH ☐    A ☐    F ☐    I ☐ or: \_\_\_\_\_

Relationship?    Yes ☐    No ☐      Children?    Yes ☐    No ☐

How much is your physical demand when you are active in your profession?

Very much ☐      Mediocore ☐      Little ☐      Not at all ☐

Do you do regularly (in season) perform endurance sports?    No ☐ , or:

Daily ☐      6x/week ☐      5x/week ☐      4x/week ☐      3x/week ☐      2x/week ☐      1x/week ☐

Mountaineering experience (years) \_\_\_\_\_

How often are you in the mountains per year? \_\_\_\_\_ Days

How many of these days do you go via ferrata? \_\_\_\_\_ Days

Are you also a rock climber?    Yes ☐    No ☐

If yes:      What is your limit leading?      \_\_\_\_\_ (UIAA or french scale)

What is your limit seconding?      \_\_\_\_\_ (UIAA or french scale)

Predominant alpine? ☐    or predominant indoor climbing or rocks / cliffs? ☐

Do you go predominantly WITH ☐ or WITHOUT ☐ guide?

Did you have ever participate in a course?

- Climbing      ☐      When? \_\_\_\_\_

- First-aid      ☐      When? \_\_\_\_\_

- Other      ☐      When? \_\_\_\_\_      What kind of course?

\_\_\_\_\_

Do you have medical knowledge as      - First-aid attendant/nurse/mountain rescue service

☐

- Medical student/doctor      ☐

- No medical profession      ☐

44 Actual via ferrata(s) (planned or recently done):  
 45 Mindelheimer Klettersteig ☐  
 46 Sentiero Alfredo Benini ☐  
 47 Sentiero delle Bocchette Centrale ☐  
 48 Sentiero delle Bocchette Alte ☐  
 49 Via delle Bocchette SOSAT ☐  
 50 Sentiero Osvaldo Orsi ☐  
 51 Sentiero Livio Brentori / delle Ideale ☐  
 52 Sentiero Ettore Castiglione ☐  
 53 Sentiero Gustavo Vidi / Claudio Constanzi ☐  
 54  
 55 Other(s): .....  
 56

57 Please describe your injuries or the incidences, which occurred while doing a via ferrata. You have  
 58 to distinguish between two kinds of health impairment: *urgent / emergency* or *overdue*.

59 Urgent events occur while or in direct connection with going a via ferrata and have to be treated in  
 60 some way (e.g. wounds, torn ligaments, fractures etc.) or have a noticeable impairment (e.g.  
 61 sunburn).

62 Overdue injuries are physical damages (especially incessant pain), which make one or more of the  
 63 following necessary: treatment, hospitalisation, a break of climbing for at least one week, unfit for  
 64 work, consultation of a physician or physiotherapist (e.g. problems of tendons, muscles or joints)  
 65 and which are occurred without a direct force or impact (fall, rock fall).

66

# 67 Overdue injuries

68 Did you ever have an overdue injury caused by going a via ferrata? Yes ☐ No ☐

69 If „Yes“, how many injuries like this did you have? \_\_\_\_\_

70

71 Did you have more than one overdue injury? ☐ No ☐ Yes. In this case please  
 72 contact us immediately!

|                         |                              |                             |            |
|-------------------------|------------------------------|-----------------------------|------------|
| Kind of overdue injury  |                              |                             |            |
| Possible cause          |                              |                             |            |
| Attended a physician?   | Yes <input type="checkbox"/> | No <input type="checkbox"/> |            |
| Attended a              | Yes <input type="checkbox"/> | No <input type="checkbox"/> |            |
| Attended a naturopathic | Yes <input type="checkbox"/> | No <input type="checkbox"/> |            |
| Unfit to work?          | Yes <input type="checkbox"/> | No <input type="checkbox"/> | How long?  |
| Treatmen necessary?     | Yes <input type="checkbox"/> | No <input type="checkbox"/> | How long?  |
| Hospitalization?        | Yes <input type="checkbox"/> | No <input type="checkbox"/> | How long?  |
| Break of climbing?      | Yes <input type="checkbox"/> | No <input type="checkbox"/> | How long?  |
| Chronic symptoms?       | Yes <input type="checkbox"/> | No <input type="checkbox"/> | Which one? |
| Remark(s)?              |                              |                             |            |

73

74

75 Did ever occur overdue injuries in any other sport? Yes ☐ No ☐

76 If "Yes": Which one? / In which kind of sport / discipline?

77

78

79 Acute emergency

80

81 Did you have more than one emergency? ☐ No

82 ☐ Yes. In this case please contact us  
83 immediately!

|                                                                                                                         |                                                                                                                                                                                                                                                                                                                                                           |                                                                                                                                                                                                                                                                                                                                         |
|-------------------------------------------------------------------------------------------------------------------------|-----------------------------------------------------------------------------------------------------------------------------------------------------------------------------------------------------------------------------------------------------------------------------------------------------------------------------------------------------------|-----------------------------------------------------------------------------------------------------------------------------------------------------------------------------------------------------------------------------------------------------------------------------------------------------------------------------------------|
| Type of emergency?<br><br><br><br><br><br><br><br><br><br>other:                                                        | <input type="checkbox"/> Fracture<br><input type="checkbox"/> Strain<br><input type="checkbox"/> Circulatory disturbance/collapse<br><input type="checkbox"/> Faintness/exhaustion<br><input type="checkbox"/> Frostbite<br><input type="checkbox"/> Sunburn<br><input type="checkbox"/> Lightning stroke                                                 | <input type="checkbox"/> Sprain<br><input type="checkbox"/> Contusion<br><input type="checkbox"/> Open wound<br><input type="checkbox"/> Hypothermia<br><input type="checkbox"/> Heat stroke<br><input type="checkbox"/> Metabolic dis. (e.g. diabetes)                                                                                 |
| Location of the injury?<br>(if necessary mark several boxes with a cross)<br><br><br><br><br><br><br><br><br><br>other: | <input type="checkbox"/> Head/brain<br><input type="checkbox"/> chest/thorax<br><input type="checkbox"/> Abdomen/lower abdomen<br><input type="checkbox"/> Forearm<br><input type="checkbox"/> Pelvis<br><input type="checkbox"/> Lower leg<br><input type="checkbox"/> Shoulder<br><input type="checkbox"/> Wrist joint<br><input type="checkbox"/> Knee | <input type="checkbox"/> Neck<br><input type="checkbox"/> Back/vertebral column<br><input type="checkbox"/> Upper arm<br><input type="checkbox"/> Hand<br><input type="checkbox"/> Upper leg<br><input type="checkbox"/> Foot<br><input type="checkbox"/> Elbow<br><input type="checkbox"/> Hip<br><input type="checkbox"/> Ankle joint |
| Cause?<br>(if necessary mark several boxes with a cross)<br><br><br><br><br><br><br><br><br><br>other:                  | <input type="checkbox"/> Slip off from metal steps etc.<br><input type="checkbox"/> Strumble<br><input type="checkbox"/> Hunger/ energy deficiency<br><input type="checkbox"/> Fatigue/ lack of concentration<br><input type="checkbox"/> Inadequate equipment<br><input type="checkbox"/> Climbing with illness                                          | <input type="checkbox"/> Rock fall<br><input type="checkbox"/> Fall<br><input type="checkbox"/> Passing manoeuvre<br><input type="checkbox"/> Weather conditions<br><input type="checkbox"/> Lack of fitness<br><input type="checkbox"/> Long-term medication forgotten                                                                 |
| Existing equipment?<br>(if necessary mark several boxes with a cross)<br><br><br><br><br><br><br><br><br><br>other:     | <input type="checkbox"/> Helmet<br><input type="checkbox"/> Mobile phone<br><input type="checkbox"/> Sunglasses<br><input type="checkbox"/> First Aid kit<br><input type="checkbox"/> Bivouac sack                                                                                                                                                        | <input type="checkbox"/> Gloves<br><input type="checkbox"/> Provisions/beverage<br><input type="checkbox"/> Sunscreen<br><input type="checkbox"/> Clothes/weather protection<br><input type="checkbox"/> Emergency blanket                                                                                                              |
| What contained the first-                                                                                               | <input type="checkbox"/> Pavement                                                                                                                                                                                                                                                                                                                         | <input type="checkbox"/> Dressing material                                                                                                                                                                                                                                                                                              |

|                                                                         |                                                                                                                                                                                         |                                                                                                                                        |
|-------------------------------------------------------------------------|-----------------------------------------------------------------------------------------------------------------------------------------------------------------------------------------|----------------------------------------------------------------------------------------------------------------------------------------|
| aid kit?<br>(if necessary mark several boxes with a cross)              | <input type="checkbox"/> Sterile compresses<br><input type="checkbox"/> SamSplint<br><input type="checkbox"/> Emergency blanket<br><input type="checkbox"/> Analgesic, .....Which one?: | <input type="checkbox"/> Hygienic gloves<br><input type="checkbox"/> Triangular bandage<br><input type="checkbox"/> Disinfection agent |
| other:                                                                  |                                                                                                                                                                                         |                                                                                                                                        |
| Emergency treated by?<br>(if necessary mark several small with a cross) | <input type="checkbox"/> Myself<br><input type="checkbox"/> Emergency medical services                                                                                                  | <input type="checkbox"/> Comrade/other climber<br><input type="checkbox"/> No treatment                                                |

84

85 Please answer the following questions by marking the correct statements. Remark: more than one  
86 per question may be correct!

|    |                                                                                                                                          |  |
|----|------------------------------------------------------------------------------------------------------------------------------------------|--|
| 1) | In bad weather you meet an uninjured person wearing shorts and T-shirt. He isn't able to descent further. He isn't completely conscious. |  |
| a  | The person is not suffering from severe (dangerous) hypothermia.                                                                         |  |
| b  | The person should be forced to descent as fast as possible.                                                                              |  |
| c  | Kneading and massage improves the situation.                                                                                             |  |
| d  | If a bivouac can't be avoided, protection against moist is more important than against wind.                                             |  |
| e  | If possible the person should not be moved.                                                                                              |  |

|    |                                                                                                                                                                           |  |
|----|---------------------------------------------------------------------------------------------------------------------------------------------------------------------------|--|
| 2) | You find an unconscious mountaineer who has neither pulse nor signs of respiration.                                                                                       |  |
| a  | During resuscitation pulse control should be performed at the person's wrist.                                                                                             |  |
| b  | The pressure point for cardiac resuscitation is localised at the left side of the breast above the heart.                                                                 |  |
| c  | The normal expiratory volume of the assistant is sufficient to breathe the unconscious person.                                                                            |  |
| d  | If the cardiopulmonary resuscitation is sufficient, the previously dilated pupils contract again.                                                                         |  |
| e  | Superextension of the head to clear the airways should be avoided since there is a risk of a fractured neck and superextension would lead to a damage of the spinal cord. |  |

|    |                                                                                  |  |
|----|----------------------------------------------------------------------------------|--|
| 3) | A mountaineer was hit by a lightning.                                            |  |
| a  | Even if he should feel well, he should be monitored for several days (hospital). |  |
| b  | Such an incident normally will not be survived.                                  |  |
| c  | Also without a fall the victim must be checked for fractures.                    |  |
| d  | Attention: if one touches this person one can suffer from an electric shock.     |  |
| e  | Danger to life can be excluded if the person wasn't hit directly.                |  |

|    |                                                                                                        |  |
|----|--------------------------------------------------------------------------------------------------------|--|
| 4) | While descending you meet a 50-years-old hiker. He is nervous, agitated, and reports about chest pain. |  |
| a  | You tell him to descent slowly, because the problems will become better then.                          |  |
| b  | He should lie on his back with heightened legs (shock position).                                       |  |
| c  | Probably he has a problem of the airways, e.g. a bronchitis.                                           |  |
| d  | He must be carried down. He should not exhaust himself any more.                                       |  |
| e  | If the pain doesn't radiate to the left arm it is probably not a cardiac disease.                      |  |

|    |                                                                                                    |  |
|----|----------------------------------------------------------------------------------------------------|--|
| 5) | After a fall a mountaineer reports of back pain at his thorax.                                     |  |
| a  | There is a particular risk of hypothermia.                                                         |  |
| b  | You should test whether there are deficiencies of the tactile sense or of the muscles of the legs. |  |
| c  | Involuntary urination may be a sign for a severe back injury.                                      |  |

|   |                                                                             |  |
|---|-----------------------------------------------------------------------------|--|
| d | Until a final diagnosis was done (hospital) any movement should be avoided. |  |
| e | Normally injuries of the back are easy to recognize because of the pain.    |  |

|    |                                                                                                                                                                                                                                                             |  |
|----|-------------------------------------------------------------------------------------------------------------------------------------------------------------------------------------------------------------------------------------------------------------|--|
| 6) | A mountaineer breaks through a snow bridge and falls into the creek below. Because of technical problems the comrades need about ¼ hour to get him out. After rescue he is unconscious without respiration and his pulse is extremely slowly and irregular. |  |
| a  | Regarding the situation in the mountains there is no hope for a success of resuscitation performed by the comrades.                                                                                                                                         |  |
| b  | At all events one must supply as much warmth as possible.                                                                                                                                                                                                   |  |
| c  | Resuscitation must be started at once.                                                                                                                                                                                                                      |  |
| d  | In this concrete case resuscitation is promising even if rescue took some time.                                                                                                                                                                             |  |
| e  | Awaking of the patient indicates the success of the resuscitation.                                                                                                                                                                                          |  |

|    |                                                                                                                  |  |
|----|------------------------------------------------------------------------------------------------------------------|--|
| 7) | In the evening a mountaineer reports about severe stabbing frontal headache and eye's pain (at a hut in 3400m).  |  |
| a  | Snow blindness is unlikely, because the whole day was misty.                                                     |  |
| b  | It should be exertion or altitude related headache.                                                              |  |
| c  | One should give him a tablet against headache and can expect that there will be no symptoms at the next morning. |  |
| d  | First Aid is laying down in a dark room and cooling eyes and forehead.                                           |  |
| e  | Normally there will be a slow improvement of the symptoms within some days.                                      |  |

|    |                                                                       |  |
|----|-----------------------------------------------------------------------|--|
| 8) | A mountaineer suffers from frostbite of his fingers.                  |  |
| a  | Early signs of a severe frostbite are blisters and red skin.          |  |
| b  | Also after reaching a hut alcohol is strictly forbidden.              |  |
| c  | Moderate frostbite should be treated by massage or rubbing with snow. |  |
| d  | Analgesics should not be used.                                        |  |
| e  | A frostbite should be waded and bandaged loosely.                     |  |

|    |                                                                                                                     |  |
|----|---------------------------------------------------------------------------------------------------------------------|--|
| 9) | In the evening a mountaineer suffers from lack of appetite, slight nausea, and headache at the Mantova Hut (3400m). |  |
| a  | Probably he suffers from influenza.                                                                                 |  |
| b  | If the symptoms don't become worse continuing to Margherita Hut (4560m) should be possible without problems.        |  |
| c  | He should stay at least one day at the Mantova Hut (rest day).                                                      |  |
| d  | The sickness can be avoided by ascending to high altitudes during several days.                                     |  |
| e  | If the symptoms should become worse, he must descent.                                                               |  |

|     |                                                                                                               |  |
|-----|---------------------------------------------------------------------------------------------------------------|--|
| 10) | At the Margherita Hut 4560m) a mountaineer reports about air hunger. His breath rattles, sometimes he coughs. |  |
| a   | Although he seems to be absolutely inconspicuously and he is conscious, there is acute danger for life.       |  |
| b   | In most cases such a situation will improve spontaneously until the next day.                                 |  |
| c   | After transportation to sea level (or in the next valley) the symptoms will be much better.                   |  |
| d   | Although the person is conscious, he should get oxygen immediately (at Margherita Hut available!).            |  |
| e   | The person should be placed with a heightened chest.                                                          |  |

|     |                                                                                           |  |
|-----|-------------------------------------------------------------------------------------------|--|
| 11) | A victim has lost much blood.                                                             |  |
| a   | One should expect the following additional symptoms: paleness, raised pulse rate.         |  |
| b   | One should expect the following additional symptoms: normal pulse, but dry and warm skin. |  |

|   |                                                                                               |  |
|---|-----------------------------------------------------------------------------------------------|--|
| c | The victim should be placed in horizontal position and with heightened legs (shock position). |  |
| d | The victim should drink as much as he can to compensate the loss of blood.                    |  |
| e | Cold-moist skin would contradict a shock.                                                     |  |

|     |                                                                                                                        |  |
|-----|------------------------------------------------------------------------------------------------------------------------|--|
| 12) | After a fall a mountaineer reports about severe pain in his thigh. He is unable to move the leg as well as to load it. |  |
| a   | A shock is possible although no external (visible) injury is obvious.                                                  |  |
| b   | By fixation and a slight pull at the foot a reduction of pain can be obtained.                                         |  |
| c   | Deviations from the leg's axis should never be corrected on scene.                                                     |  |
| d   | It should be a severe contusion.                                                                                       |  |
| e   | The injured leg should be placed heightened.                                                                           |  |

|     |                                                                                                                                        |  |
|-----|----------------------------------------------------------------------------------------------------------------------------------------|--|
| 13) | Strategy in cases of emergencies                                                                                                       |  |
| a   | Each injury registered during checking the patient must be treated at once.                                                            |  |
| b   | If one expects a victim could die during a bivouac, the only chance is to force a transport to the next hut performed by the comrades. |  |
| c   | The safety of the rescuer is without any exception more important than the immediate medical attendance of the victim.                 |  |
| d   | An objective danger may demand an immediate transport of the victim without treatment.                                                 |  |
| e   | A retreat with a victim in easy terrain often strengthens more than in steep terrain.                                                  |  |

|     |                                                                                                                |  |
|-----|----------------------------------------------------------------------------------------------------------------|--|
| 14) | A hiker fell down and is unconscious.                                                                          |  |
| a   | Victims with head injuries should be placed flat.                                                              |  |
| b   | A fall on a smooth surface (e.g. a moss patch) would exclude dangerous head injuries.                          |  |
| c   | A cerebral trauma could be recognised by wounds of the head.                                                   |  |
| d   | It has to be considered that injuries of the head are often associated with injuries of the cervical vertebra. |  |
| e   | Dilated pupils indicate that there is no damage of the brain.                                                  |  |

|     |                                                                                                                                   |  |
|-----|-----------------------------------------------------------------------------------------------------------------------------------|--|
| 15) | After a several-hours walk shortly above tree limit at summer-like conditions a hiker collapses with the sign of a deep red head. |  |
| a   | If he has a dry and hot skin, he probably suffers from a heat-stroke.                                                             |  |
| b   | The fastest improvement could be obtained by cooling the person with water as cold as possible.                                   |  |
| c   | A cardiac disease can be excluded.                                                                                                |  |
| d   | This disease could be avoided by wearing a headgear.                                                                              |  |
| e   | After a long rest and complete recovery a slow descent without any luggage is usually possible.                                   |  |
| 16) | After a fall the victim complains of severe pain in the right breast and difficulties to breathe.                                 |  |
| a   | The hurt person should be laid on his injured right side.                                                                         |  |
| b   | Probably there is a fracture of several ribs.                                                                                     |  |
| c   | Since only one side of the breast is injured, one shouldn't expect a danger of life.                                              |  |
| d   | If air exits out of the wound, it has to be closed by a tight bandage.                                                            |  |
| e   | To avoid secondary injuries, the person should be laid on his uninjured left side.                                                |  |

|     |                                                                                                        |  |
|-----|--------------------------------------------------------------------------------------------------------|--|
| 17) | Analgesia in the wilderness                                                                            |  |
| a   | In case of severe abdominal pain relaxing the abdominal wall and heighten the legs would help.         |  |
| b   | Aspirine and similar analgesics do not have adverse effects.                                           |  |
| c   | In emergencies the use of strong analgesics persons with less medical experience could be recommended. |  |
| d   | Severe pain could be induced by warming up a frostbite.                                                |  |

|   |                                                        |  |
|---|--------------------------------------------------------|--|
| e | Circulation and respiration could be impaired by pain. |  |
|---|--------------------------------------------------------|--|

|     |                                                                                                                                                         |  |
|-----|---------------------------------------------------------------------------------------------------------------------------------------------------------|--|
| 18) | Check these statements for correctness!                                                                                                                 |  |
| a   | In high altitude severe headache could be caused by a sunstroke as well as by a high-altitude cerebral edema.                                           |  |
| b   | In high altitude (snow/ice) a heat stroke is not expected.                                                                                              |  |
| c   | An alpinist with a high-altitude cerebral edema attracts attention e. g. with an incertitude of gait or unexpected reactions and acts.                  |  |
| d   | Nightly sharp headache is normally a sign for a high-altitude sickness and never for snow blindness (darkness).                                         |  |
| e   | The measure to ameliorate a high-altitude cerebral edema are oxygen therapy, transport in lower level and – if available – administration of cortisone. |  |

92

93 Please assess your knowledge on first aid in mountaineering emergencies of the following  
94 subjects. (Please mark only one category in each row)

|                               | Very good                | Well                     | Average                  | Fragmentary              | Little/no                |
|-------------------------------|--------------------------|--------------------------|--------------------------|--------------------------|--------------------------|
| Hypothermia                   | <input type="checkbox"/> |
| Shock                         | <input type="checkbox"/> |
| Mountain sickness             | <input type="checkbox"/> |
| Cardiopulmonary resuscitation | <input type="checkbox"/> |
| Frostbite                     | <input type="checkbox"/> |
| Acclimatisation               | <input type="checkbox"/> |
| Emergencies of the heart      | <input type="checkbox"/> |
| Head injuries                 | <input type="checkbox"/> |
| Fractures                     | <input type="checkbox"/> |
| Rescue strategies             | <input type="checkbox"/> |
| Checkup of injured person     | <input type="checkbox"/> |
| High-altitude pulmonary       | <input type="checkbox"/> |
| Illness on the way            | <input type="checkbox"/> |
| Heat stroke                   | <input type="checkbox"/> |
| Snow blindness                | <input type="checkbox"/> |

95 Remarks/Suggestions for future education:

96

97

98

99 If you want to know the result of the study, please write down your email address:

100

101 \_\_\_\_\_

102 Thank you very much for your cooperation!

103
